# Supplementary material for: Large-scale polymorphism of heterochromatic repeats in the DNA of Arabidopsis thaliana
Source: PubMed Central journal article supplement (PMC2000876; doi:10.1186/1471-2229-7-44), 2007-08-16
Supplement: 1471-2229-7-44-S2.pdf [file 1471-2229-7-44-S2.pdf]

GS\_table. Survey of genome size variation in *A. thaliana* determined by flow cytometry.

| Average genome size (Mbp) | Size relative to Col-0 | Accession name | Identification code | Standard deviation | CV  | No. of individuals measured |
|---------------------------|------------------------|----------------|---------------------|--------------------|-----|-----------------------------|
| 149.3                     | 0.95                   | Ta-0           | CS1548              | 0.8                | 0.6 | 2                           |
| 153.1                     | 0.98                   | Lip-0          | CS1336              | 0.2                | 0.1 | 2                           |
| 154.6                     | 0.99                   | Br-0           | 9A Br-0 A           | 2.4                | 1.5 | 2                           |
| 155.2                     | 0.99                   | Sp-0           | CS1530              | 2.6                | 1.7 | 2                           |
| 156.5                     | 1.00                   | Col-0          | 8F Col-0 A          | 0.8                | 0.5 | 5                           |
| 157.5                     | 1.01                   | GOT-7          | 6E GOT-7 B          | 2.2                | 1.4 | 2                           |
| 158.0                     | 1.01                   | GOT-22         | 6F GOT-22 A         | 0.5                | 0.3 | 2                           |
| 158.3                     | 1.01                   | Rsch-0         | CS1490              | 3.6                | 2.3 | 2                           |
| 158.4                     | 1.01                   | Ag-0           | 9C Ag-0 A           | 0.2                | 0.2 | 2                           |
| 159.0                     | 1.02                   | Yo-0           | 8E Yo-0 A           |                    |     | 1                           |
| 159.9                     | 1.02                   | Nc-1           | CS1388              | 3.6                | 2.2 | 2                           |
| 160.0                     | 1.02                   | Is-0           | CS1240              | 3.0                | 1.9 | 4                           |
| 160.5                     | 1.03                   | Ct-1           | CS6674              | 1.2                | 0.7 | 2                           |
| 160.5                     | 1.03                   | Per-1          | CS1444              | 2.0                | 1.2 | 2                           |
| 161.2                     | 1.03                   | RRS-10         | 1B RRS-10 A         | 0.3                | 0.2 | 2                           |
| 161.4                     | 1.03                   | Tsu-0          | CS1564              | 0.7                | 0.4 | 2                           |
| 162.9                     | 1.04                   | Eden-1         | 2A Eden-1 C         |                    |     | 1                           |
| 164.5                     | 1.05                   | TAMM-2         | 6A TAMM-2 A         | 0.8                | 0.5 | 2                           |
| 166.9                     | 1.07                   | Kondara        | 11H Kondara A       | 0.4                | 0.2 | 1                           |
| 169.1                     | 1.08                   | Nok-3          | CS6810              | 3.7                | 2.2 | 2                           |
| 169.7                     | 1.08                   | Wt-5           | CS6896              |                    |     | 1                           |
| 169.9                     | 1.09                   | Loh-0          | CS1350              | 3.4                | 2.0 | 2                           |

Units are millions of base pairs (Mbp). Accession identification code is either the ABRC stock number (those starting with CS) or that given by the laboratory of Magnus Nordborg. CV: Coefficient of variation is the standard deviation presented as percent of the mean. Prepared samples of each individual were measured two to three times.
